# Supplementary material for: NMR insights on nano silver post-surgical treatment of superficial caseous lymphadenitis in small ruminants
Source: Royal Society of Chemistry journal article supplement (doi:10.1039/c8ra08218a), 2018-01-01
Supplement: c8ra08218a1.pdf [file c8ra08218a1.pdf]

## Supporting Information

### **NMR insights on Nano silver post-surgical treatment of superficial caseous lymphadenitis in small ruminants**

Danijela Stanisic<sup>1#</sup>, Natália L. Fregonesi<sup>1</sup>, Caio H. N. Barros<sup>1</sup>, João G. M. Pontes<sup>1</sup>, Stephanie F. Fulaz<sup>1</sup>, Ulisses J. Menezes<sup>2</sup>, Jorge L. Nicoleti<sup>2</sup>, Thiago L. P. Castro<sup>3</sup>, Núbia Seyffert<sup>3</sup>, Vasco A. C. Azevedo<sup>3</sup>, Nelson Durán<sup>4,5</sup>, Ricardo W. Portela<sup>2</sup>, Ljubica Tasic<sup>1,4\*</sup>

<sup>1</sup>Laboratório de Química Biológica, Departamento de Química Orgânica, Instituto de Química, Universidade Estadual de Campinas, Campinas-SP, Brazil.

<sup>2</sup>Laboratório de Imunologia e Biologia Molecular, Instituto de Ciências da Saúde, Universidade Federal da Bahia, Salvador-BA, Brazil.

<sup>3</sup>Departamento de Biologia Geral, Instituto de Estudos Avançados Transdisciplinares, Universidade Federal de Minas Gerais, Belo Horizonte-MG, Brazil.

<sup>4</sup>NanoBioSS – Institute of Chemistry, University of Campinas, Campinas, SP, Brazil.

<sup>5</sup>UFABC, São Paulo, SP, Brazil.

Corresponding author: [ljubica@iqm.unicamp.br](mailto:ljubica@iqm.unicamp.br)

**KEYWORDS:** *Corynebacterium pseudotuberculosis*, Nuclear Magnetic Resonance, metabolomics, caseous lymphadenitis, biogenic nanosilver based cream, wound healing, antimicrobial activity.

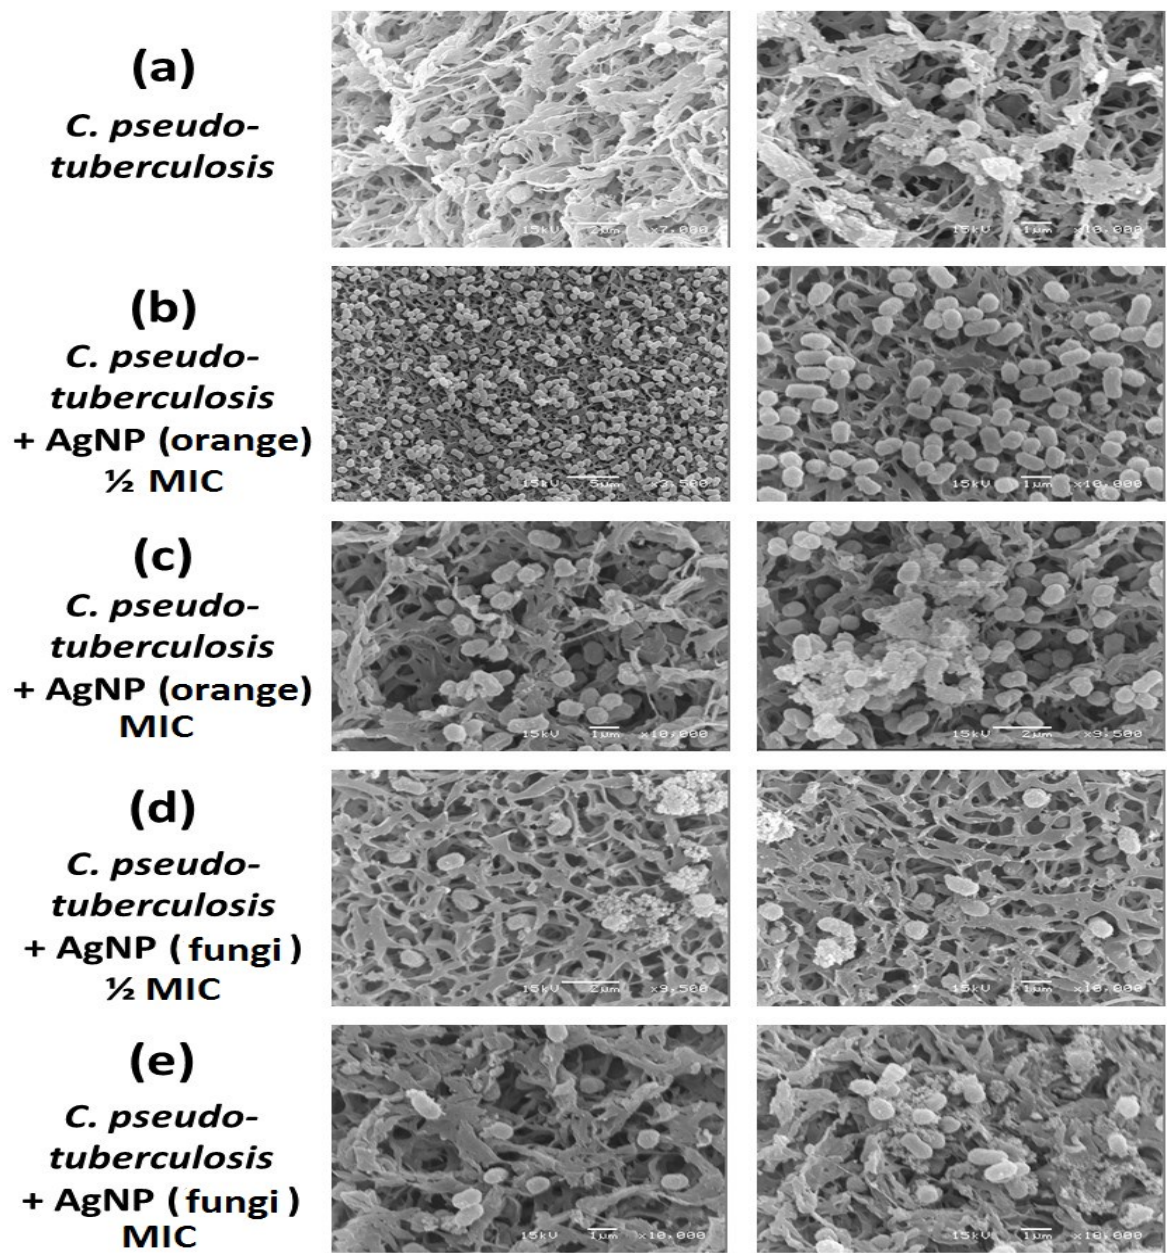

**Figure S1.** SEM Images of *Corynebacterium pseudotuberculosis*: (a) cells at a great dilution; (b) after addition of the biogenic AgNPs synthesized from the orange (*Citrus sinensis*) peel extract in the concentration of  $11.0 \mu\text{g mL}^{-1}$  (half of the MIC); (c) at the concentration  $22.0 \mu\text{g mL}^{-1}$  (MIC); (d) bacteria with biogenic AgNPs synthesized from *Fusarium oxysporum* in the concentration  $16.8 \mu\text{g mL}^{-1}$  (half of the MIC); (e) at the concentration  $33.5 \mu\text{g mL}^{-1}$  (MIC).

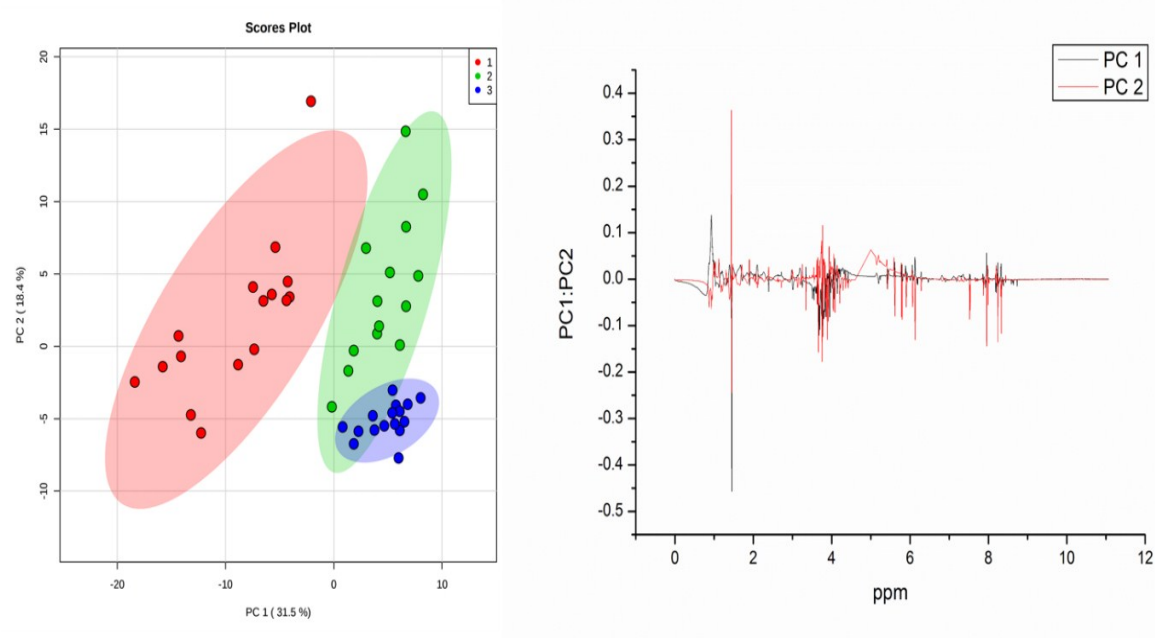

**Figure S2.** PCA on *C. pseudotuberculosis* NMR data: 2D score (left) and loading graphs (right). NMR data variances were 31.5% in PC 1 and 18.4% in PC 2. The NMR data were normalized by sum and mean centered previous to PCA. The red circles present the group of *C. pseudotuberculosis* extract, the green circles correspond to *C. pseudotuberculosis* extract under ampicillin effects and blue circles represent the *C. pseudotuberculosis* extract under AgNP effects.

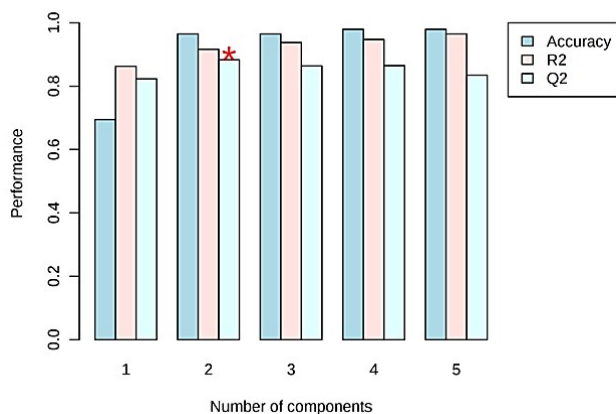

**PLS-DA cross validation details:**

| Measure  | 1 comps | 2 comps | 3 comps | 4 comps | 5 comps |
|----------|---------|---------|---------|---------|---------|
| Accuracy | 0.89444 | 0.96528 | 0.96528 | 0.97917 | 0.97917 |
| R2       | 0.8824  | 0.91588 | 0.93738 | 0.94758 | 0.96502 |
| Q2       | 0.82281 | 0.88288 | 0.8837  | 0.86489 | 0.83498 |

**Figure S3.** Cross validation of *C. pseudotuberculosis* extract PLS-DA model using different number of components. The red star indicates the best classifier.

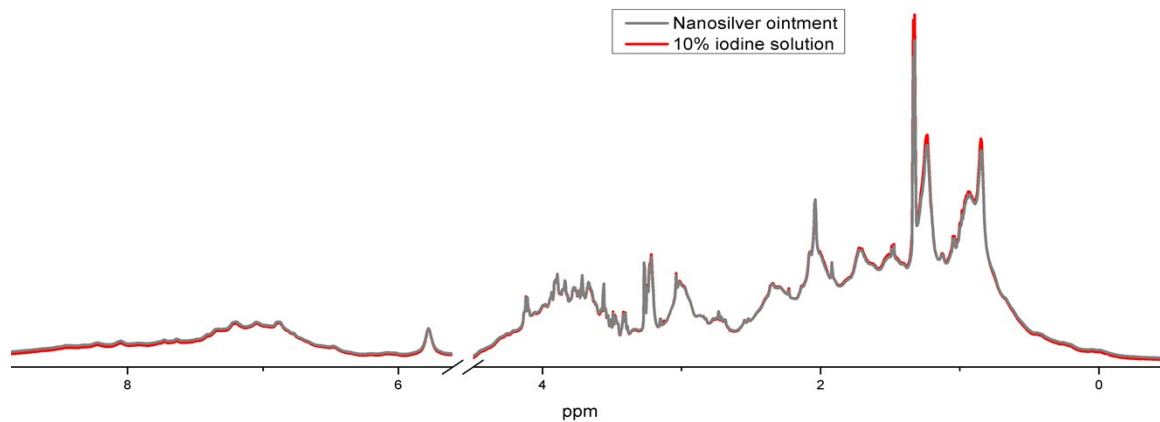

**Figure S4.** Mean <sup>1</sup>H NMR spectra of serum samples taken from goats treated with iodine solution (red line) and AgNP-based cream (gray line).

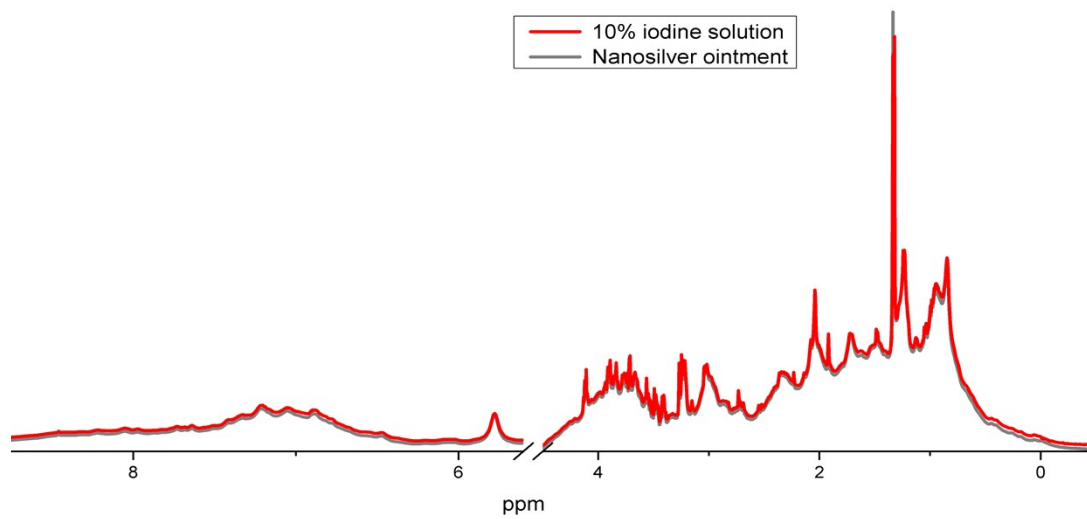

**Figure S5.** Mean <sup>1</sup>H NMR spectra of serum samples taken from sheep treated with iodine solution (red line) and AgNP-based cream (gray line).

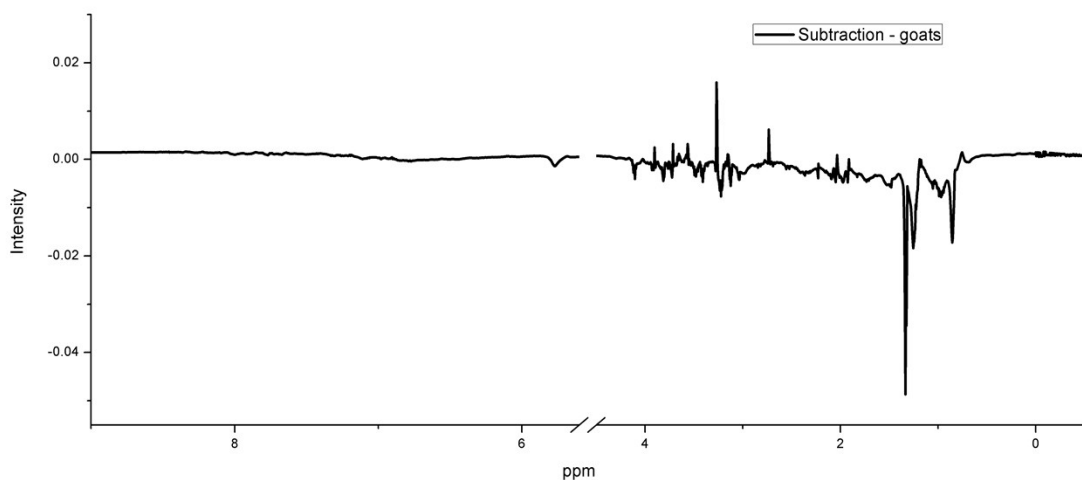

**Figure S6.** Subtraction of serum  $^1\text{H}$  NMR mean spectra, shown in Figure S4, iodine solution versus AgNP-based cream (I-P). There are minimal differences in spectral data when compared serum samples from two treatments.

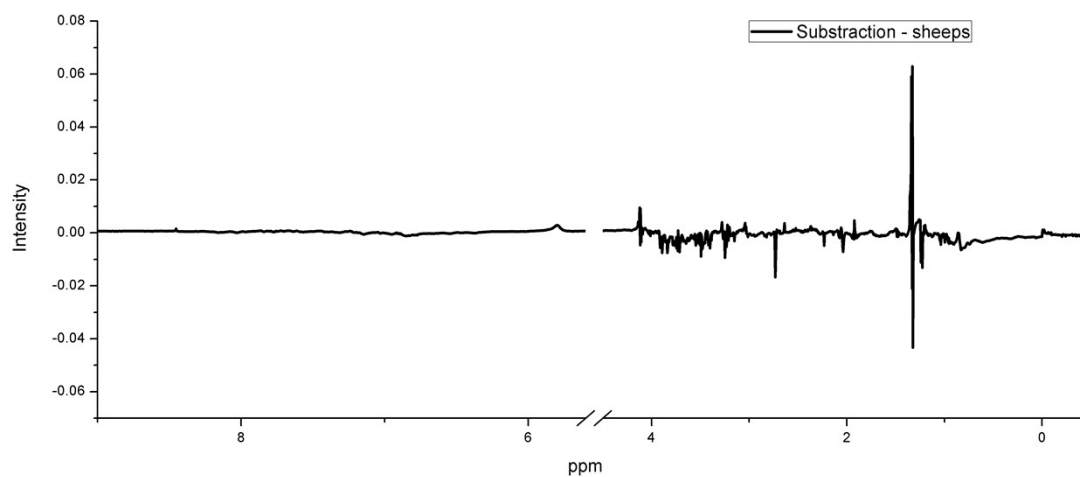

**Figure S7.** Subtraction of serum  $^1\text{H}$  NMR mean spectra, shown in Figure S5, iodine solution versus AgNP-based cream (I-P). There are minimal differences in spectral data when compared serum samples from two treatments.

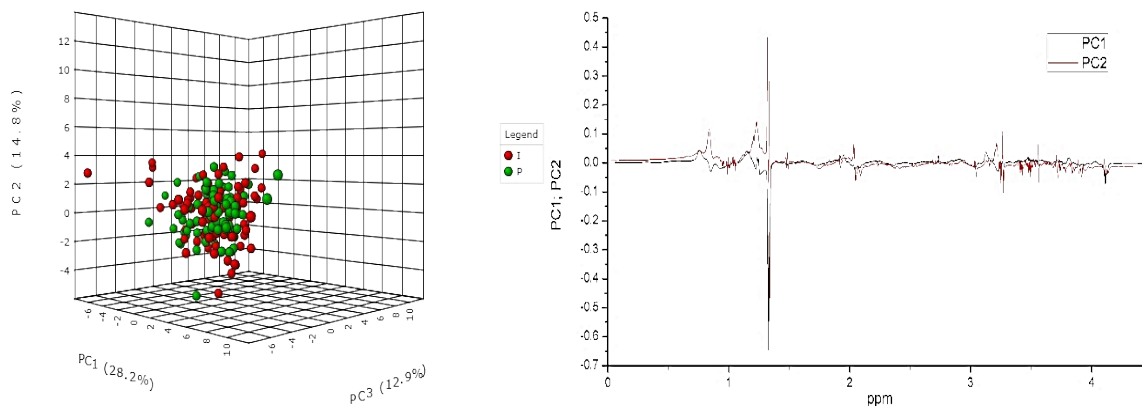

**Figure S8.  $^1\text{H}$  NMR PCA data on goat serum samples:** 3D scores (left) and loadings (right) with variance of 28.2% in PC 1 and 14.8% in PC 2. The NMR data were normalized by sum and mean centered after the exclusion of outliers. The green circles correspond to animals treated with AgNP-based cream (P) and the red circles correspond to the NMR data of animals treated with iodine 10% (I).

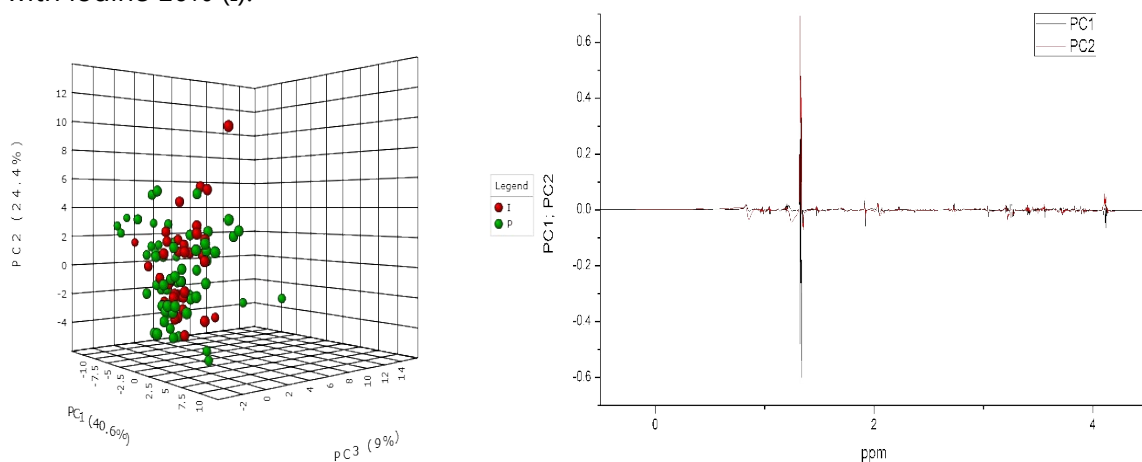

**Figure S9.  $^1\text{H}$  NMR PCA data on sheep serum samples:** 3D scores (left) and loadings (right) with variance of 40.6% in PC 1 and 24.4% in PC 2. The NMR data were normalized by sum and mean centered after the exclusion of outliers. The green circles correspond to animals treated with AgNP-based cream (P) and the red circles correspond to the NMR data of animals treated with iodine 10% (I).

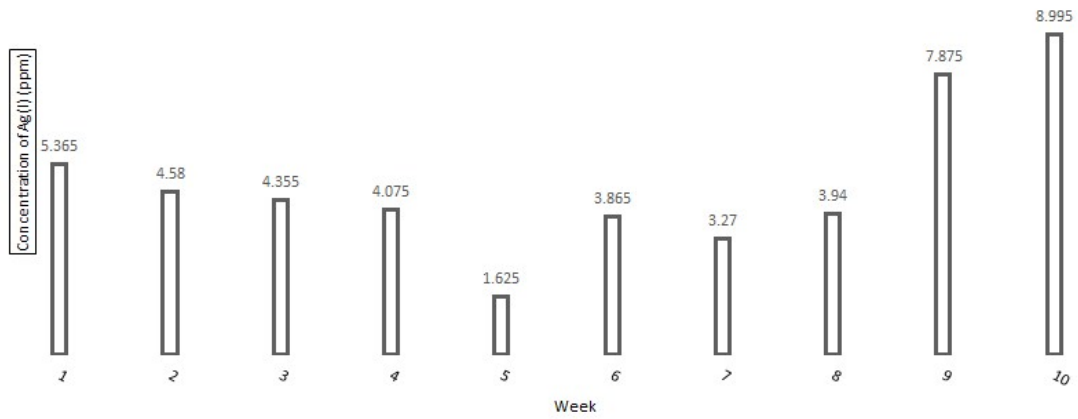

**Figure S10.** Concentration of silver in serum sample from sheep treated with AgNP-based cream during 10 weeks, numbers 1-10 mean week upon treatment had started.
